# Supplementary material
Source: PubMed Central journal article supplement (PMC2234125)
Supplement: pnas_0704963105_4.pdf [file pnas_0704963105_4.pdf]

Table 1. GFP expression patterns and transposon integration sites in hspGGFF

## enhancer trap lines

| Line | GFP expression*    | Integration locus                    | Chromosome |
|------|--------------------|--------------------------------------|------------|
| 1B   | heart              | G-protein coupled receptor (GPR)103  | 13         |
| 1C   | pronephric duct    | ENSDARESTT00000008584 (intron)       | 16         |
| 2A   | spinal cord, heart | ENSDARESTT00000017611                | 21         |
| 3A   | heart              | wbp2 (intron)                        |            |
| 3B   | hatching gland     | ENSDARESTT00000024218                | 3          |
| 4A   | nose               | Homer protein homologue 3 (intron)   |            |
| 4B   | blood island       | GBR2-related adaptor protein         | 3          |
| 4C   | notochord          | CaM kinase II gamma subunit (intron) | 12         |
| 6A   | nose               | ENSDARESTT00000015222(intron)        | 8          |
| 10B  | habenulae          | GluR4B (intron)                      | 21         |
| 10C  | yolk               | unmapped                             |            |
| 14A  | eye                | GENESCAN00000040899 (intron)         | 6          |
| 14B  | hypothalamus       | ENSDART00000013281                   | 18         |
| 14C  | hindbrain          | ENSDARESTT0000003873 (intron)        | 16         |
| 15A  | CNS                | skib (exon)                          | 11         |
| 17A  | skin               | zgc:92242 (intron)                   | 14         |
| 17B  | heart              | ctbp2(intron)                        | 17         |
| 17C  | heart, nose        | GENESCAN00000033632 (intron)         |            |
| 19B  | somite             | GENESCAN00000019503 (intron)         | 17         |
| 19C  | hypothalamus       | Ribosomal protein S6 kinase alpha-5  | 17         |
| 20A  | pronephric duct    | GENESCAN00000004079 (intron)         | 13         |
| 22A  | somite             | GENESCAN00000042991 (intron)         | 3          |
| 23A  | notochord          | GENESCAN00000006799 (intron)         | 19         |
| 23C  | blood vessel       | GENESCAN00000017568                  | 6          |
| 25A  | skin               | ENSDART00000020978                   | 16         |
| 26A  | blood island       | GENESCAN00000020022 (intron)         | 5          |
| 27A  | Anterior CNS       | GENESCAN00000030251 (intron)         | 7          |
| 30A  | whole body         | unmapped                             |            |
| 37A  | muscle             | GENESCAN00000024018 (intron)         | 6          |

\* GFP expression patterns in double transgenic embryos carrying the hspGGFF enhancer trap insertions and the UAS:GFP reporter construct are described.
