# Supplementary material
Source: PubMed Central journal article supplement (PMC2234125)

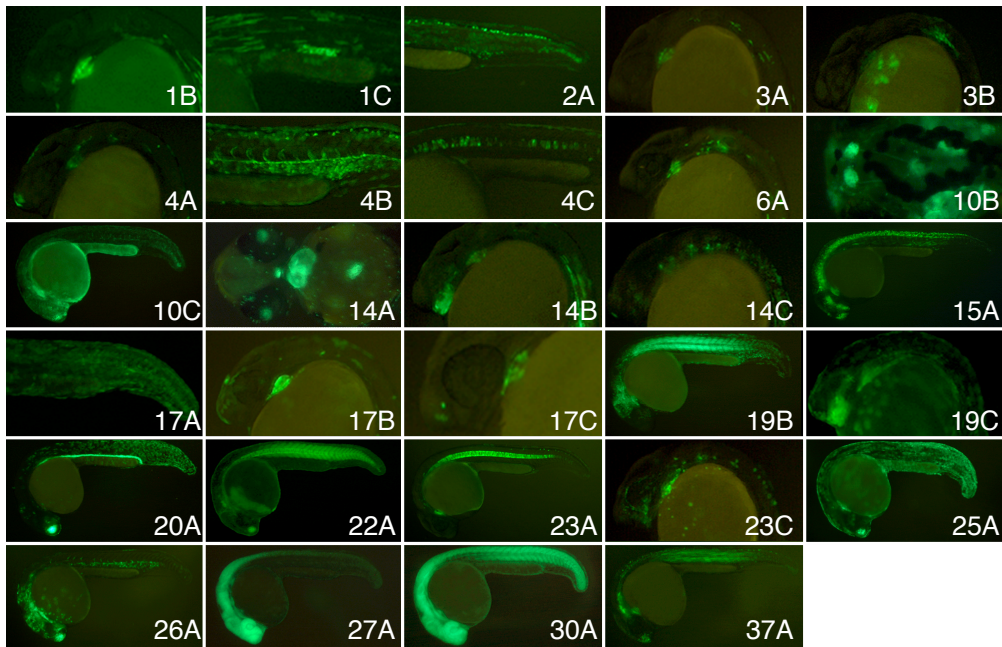

Supplement: pnas_0704963105_1.pdf [file pnas_0704963105_1.pdf]

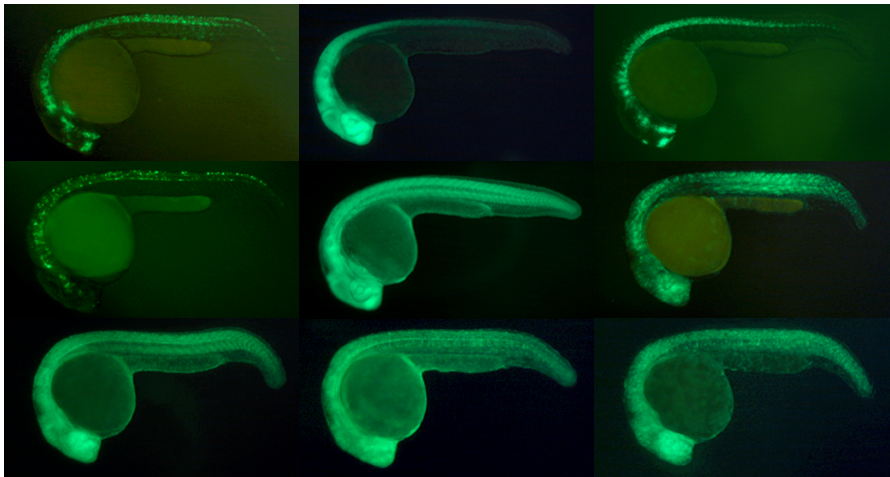

Supplement: pnas_0704963105_2.pdf [file pnas_0704963105_2.pdf]

hspGGFF27A;UAS:TeTxLC:CFP

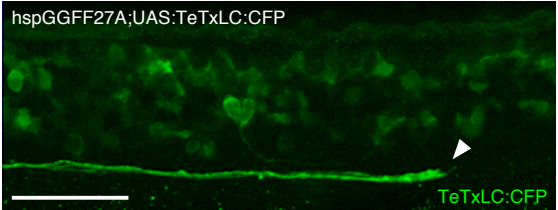

Supplement: pnas_0704963105_3.pdf [file pnas_0704963105_3.pdf]
